# Supplementary material for: Synthesis of ruthenium complexes functionalized with benzothiophene and their antibacterial activity against Staphylococcus aureus
Source: Royal Society of Chemistry journal article supplement (doi:10.1039/d0dt04258g), 2021-01-01

# Supporting Information

## Synthesis Ruthenium complexes Functionalized with Benzothiophene and their Antibacterial activity against *Staphylococcus aureus*

Xiangwen Liao<sup>as\*</sup>, Lianghong Liu<sup>b§</sup>, Yanhui Tan<sup>c§</sup>, Guijuan Jiang<sup>a\*</sup>, Haihong  
Fang, Yanshi Xiong<sup>a</sup>, Xuemin Duan<sup>a</sup>, Guangbin Jiang<sup>d</sup>, Jintao Wang<sup>a</sup>

<sup>a</sup> School of Pharmacy, Jiangxi Science & Technology Normal University, Nanchang, 330013, China

<sup>b</sup> School of Pharmaceutical Sciences, Hunan University of Medicine, Huaihua, 418000, China

<sup>c</sup> State Key Laboratory for Chemistry and Molecular Engineering of Medicinal Resources, School of Chemistry and Pharmacy, Guangxi Normal University, Guilin, 541004, China

<sup>d</sup> Guangxi Key Laboratory of Electrochemical and Magneto-chemical Function Materials, College of Chemistry and Bioengineering, Guilin University of Technology, Guilin, 541004, China

§ These author contribute equally to this work

\*Correspondence author.

Tel/Fax: +86 791 8380-2393;

E-mail address: [jgjchem@163.com](mailto:jgjchem@163.com) (G.J. Jiang) or [liao492008522@163.com](mailto:liao492008522@163.com) ( X.W. Liao)

### List of Contents

|                                      |           |
|--------------------------------------|-----------|
| <b>A. Figure and Table</b> .....     | <b>S2</b> |
| <b>B. Spectra of Complexes</b> ..... | <b>S3</b> |

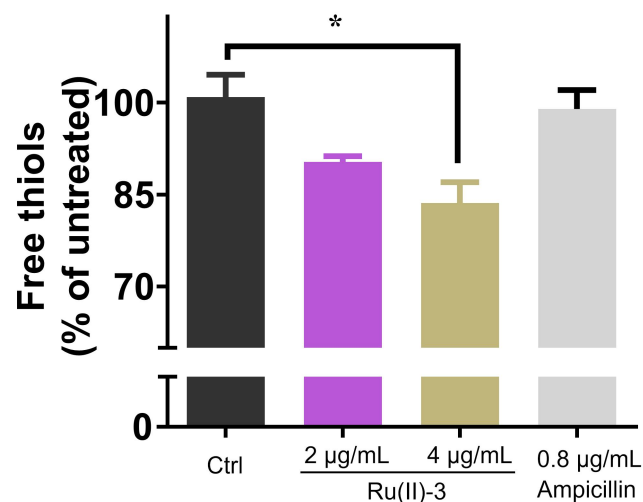

**Figure S1** *S. aureus* cultures treated with indicated concentrations of **Ru(II)-3** for 30 min show a decrease in free thiol concentration relative to untreated control.

**Table S1** Minimum inhibition concentration (MIC) of all the compounds against *Pseudomonas aeruginosa* bacterial strains.

| Compounds                               | Minimum inhibition concentration (MIC) |
|-----------------------------------------|----------------------------------------|
| <b>Ru(II)-1</b>                         | 0.250 mg/mL                            |
| <b>Ru(II)-2</b>                         | 0.250 mg/mL                            |
| <b>Ru(II)-3</b>                         | 0.150 mg/mL                            |
| <b>RuCl<sub>3</sub>.3H<sub>2</sub>O</b> | >0.250 mg/mL                           |

## Spectra of Complexes

### $^1\text{H}$ NMR of $[\text{Ru}(\text{phen})_2(\text{BTPIP})](\text{ClO}_4)_2$ (Ru(II)-1)

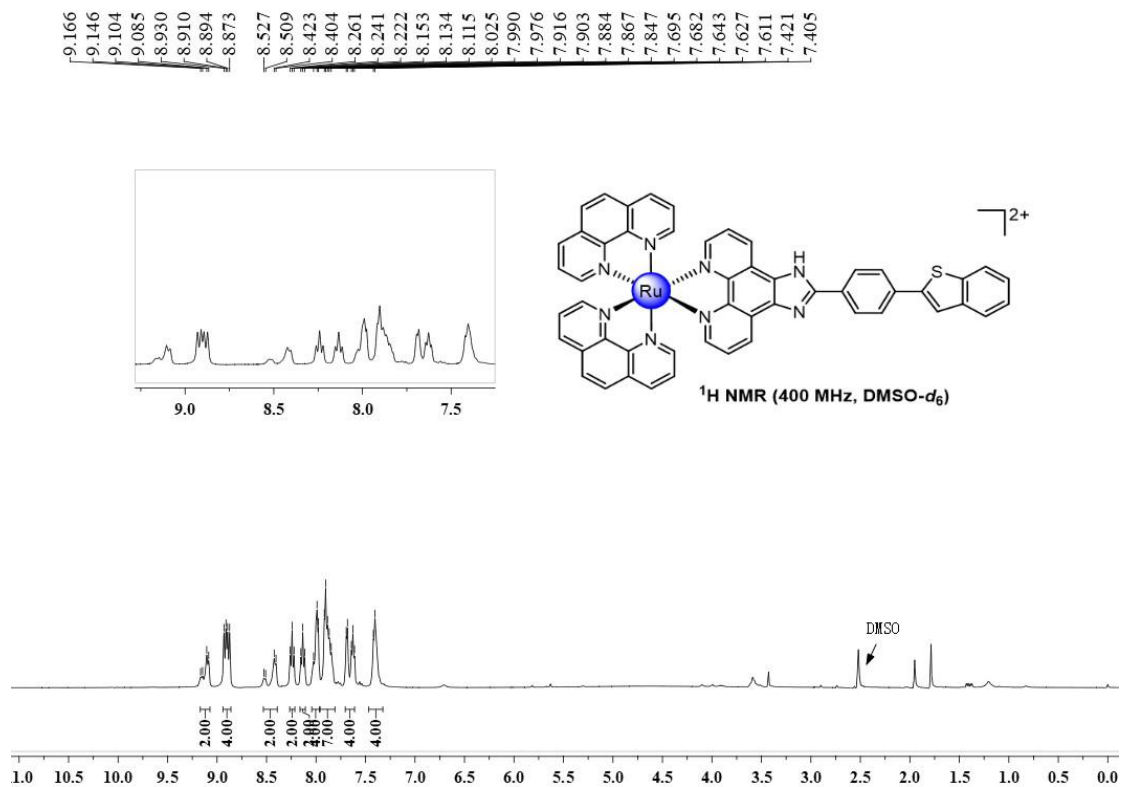

# $^{13}\text{C}$ NMR of $[\text{Ru}(\text{phen})_2(\text{BTPIP})](\text{ClO}_4)_2$ (Ru(II)-1)

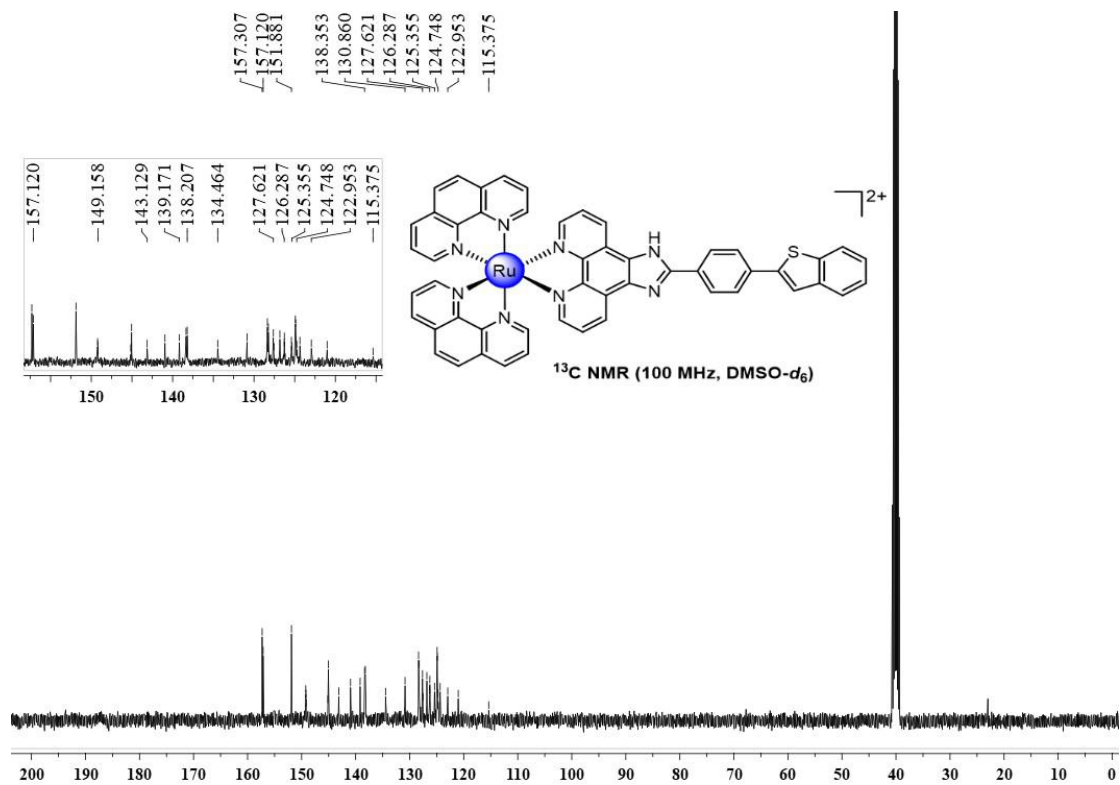

## HRMS of [Ru(phen)<sub>2</sub>(BTPIP)](ClO<sub>4</sub>)<sub>2</sub> (Ru(II)-1)

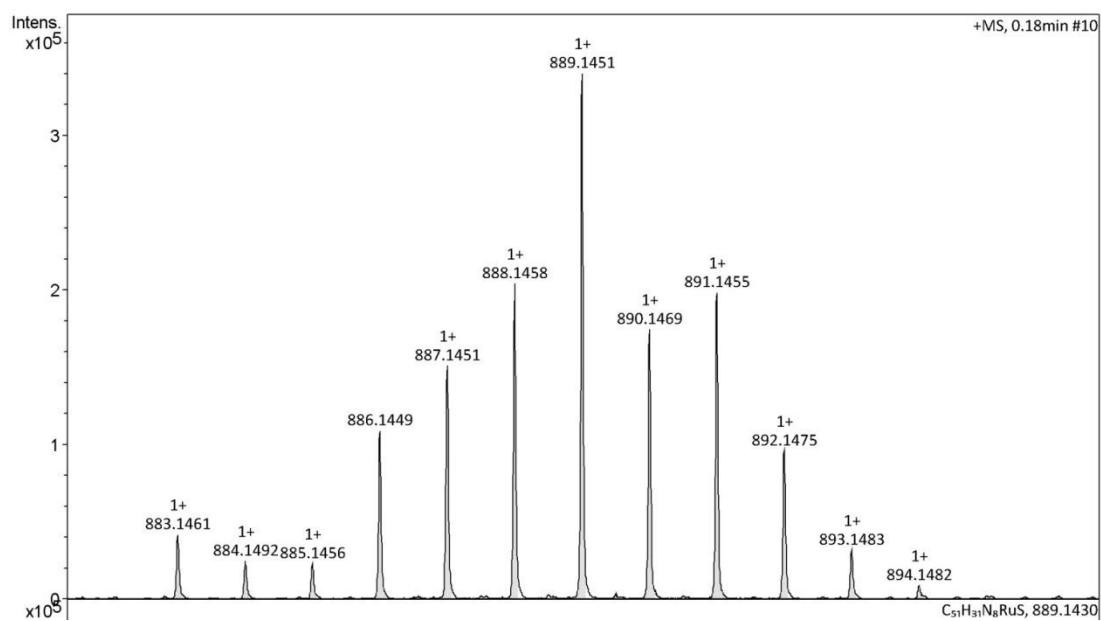

### Acquisition Parameter

|             |          |                      |          |                  |           |
|-------------|----------|----------------------|----------|------------------|-----------|
| Source Type | ESI      | Ion Polarity         | Positive | Set Nebulizer    | 0.6 Bar   |
| Focus       | Active   | Set Capillary        | 3500 V   | Set Dry Heater   | 180 °C    |
| Scan Begin  | 50 m/z   | Set End Plate Offset | -500 V   | Set Dry Gas      | 4.0 l/min |
| Scan End    | 1000 m/z | Set Charging Voltage | 0 V      | Set Divert Valve | Waste     |
|             |          | Set Corona           | 0 nA     | Set APCI Heater  | 0 °C      |

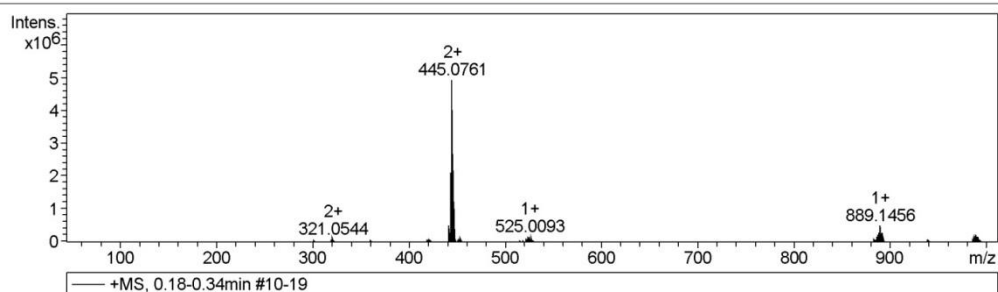

### IR of [Ru(phen)<sub>2</sub>(BTPIP)](ClO<sub>4</sub>)<sub>2</sub> (Ru(II)-1)

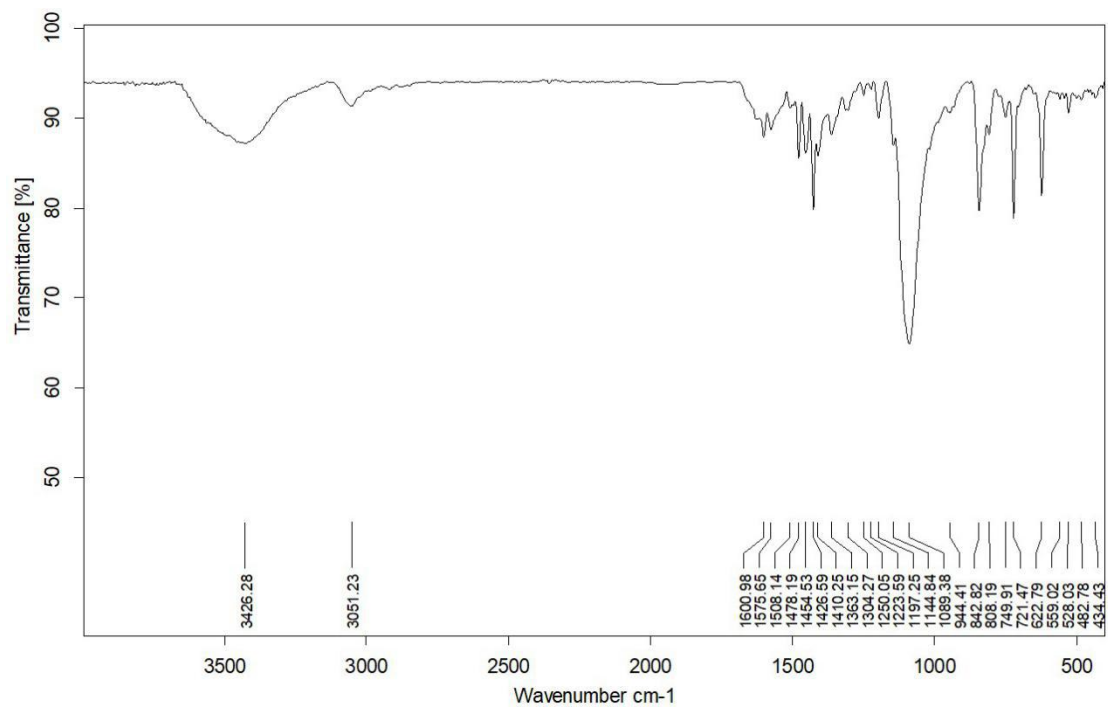

# $^1\text{H}$ NMR of $[\text{Ru}(\text{dmp})_2(\text{BTPIP})](\text{ClO}_4)_2$ (Ru(II)-2)

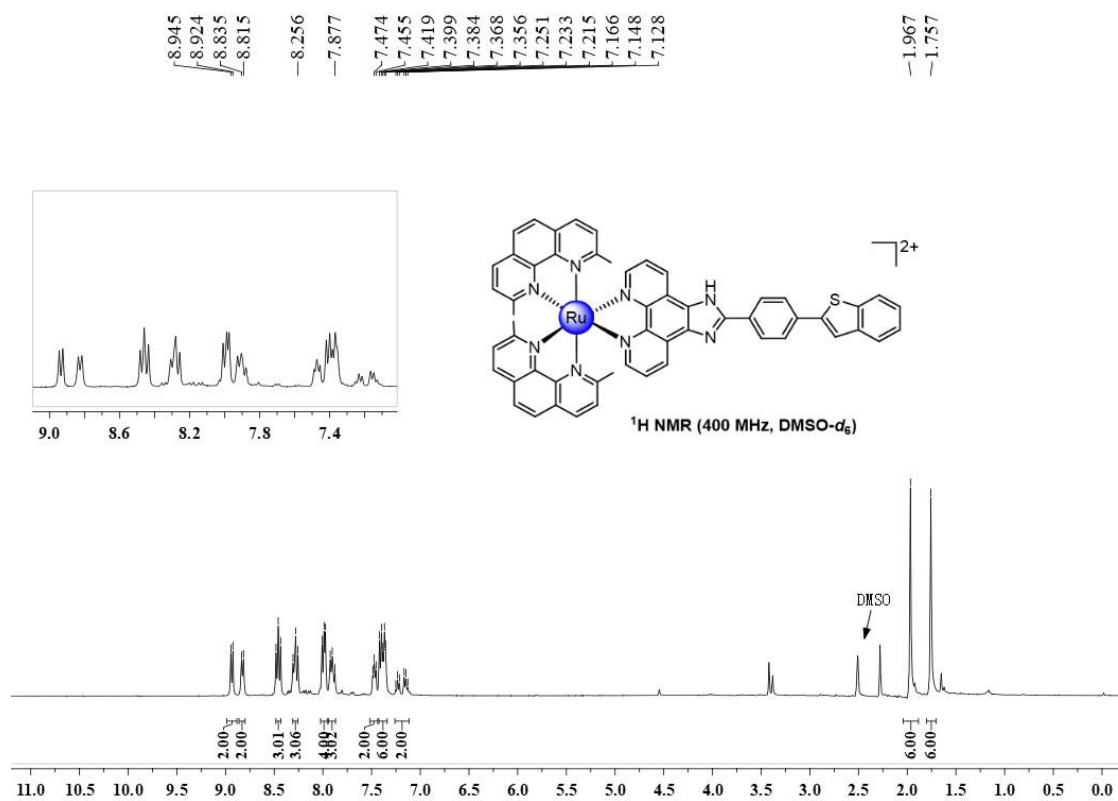

# $^{13}\text{C}$ NMR of $[\text{Ru}(\text{dmp})_2(\text{BTPIP})](\text{ClO}_4)_2$ (Ru(II)-2)

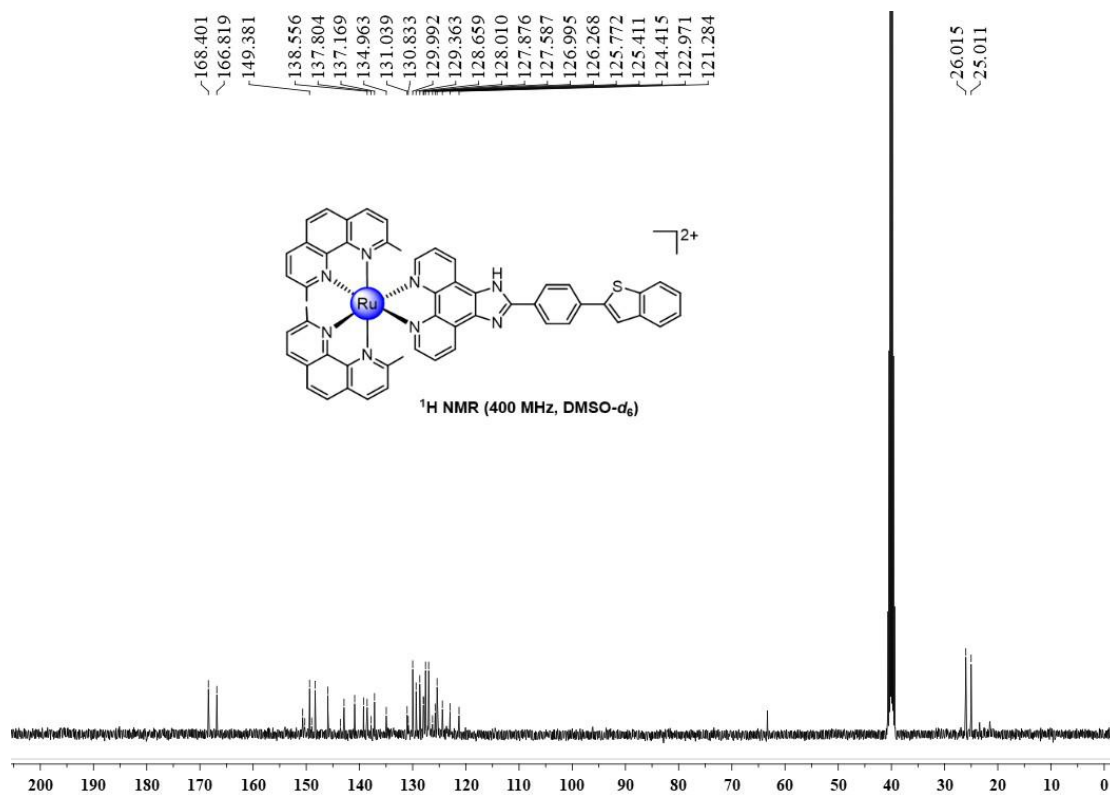



## HRMS of [Ru(dmp)<sub>2</sub>(BTPIP)](ClO<sub>4</sub>)<sub>2</sub> (Ru(II)-2)

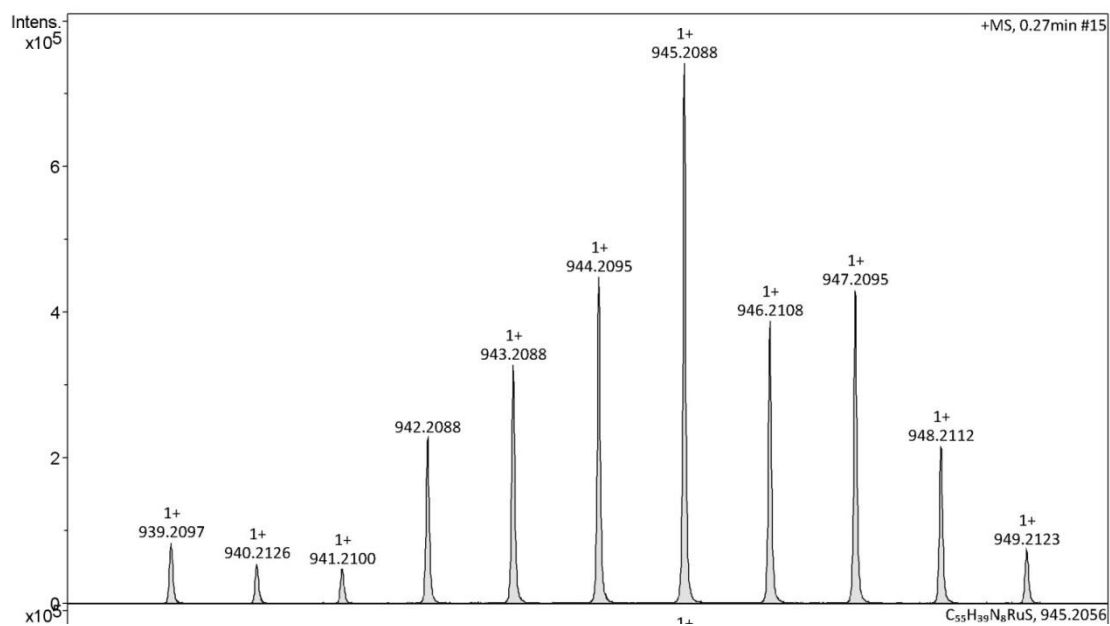

### Acquisition Parameter

|             |          |                      |          |                  |           |
|-------------|----------|----------------------|----------|------------------|-----------|
| Source Type | ESI      | Ion Polarity         | Positive | Set Nebulizer    | 0.6 Bar   |
| Focus       | Active   | Set Capillary        | 3500 V   | Set Dry Heater   | 180 °C    |
| Scan Begin  | 50 m/z   | Set End Plate Offset | -500 V   | Set Dry Gas      | 4.0 l/min |
| Scan End    | 1000 m/z | Set Charging Voltage | 0 V      | Set Divert Valve | Waste     |
|             |          | Set Corona           | 0 nA     | Set APCI Heater  | 0 °C      |

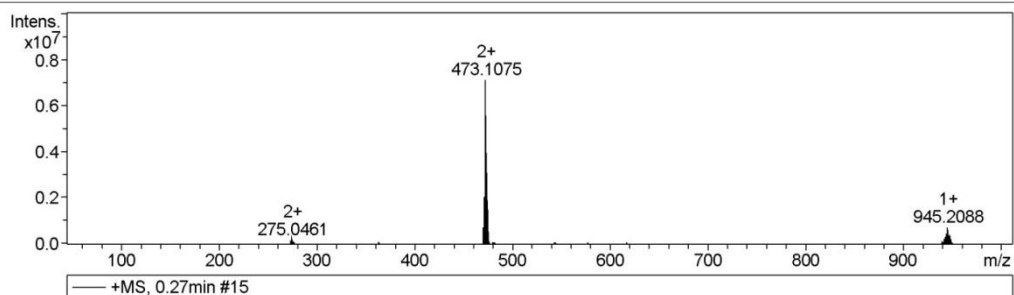

**IR of [Ru(dmp)<sub>2</sub>(BTPIP)](ClO<sub>4</sub>)<sub>2</sub> (Ru(II)-2)**

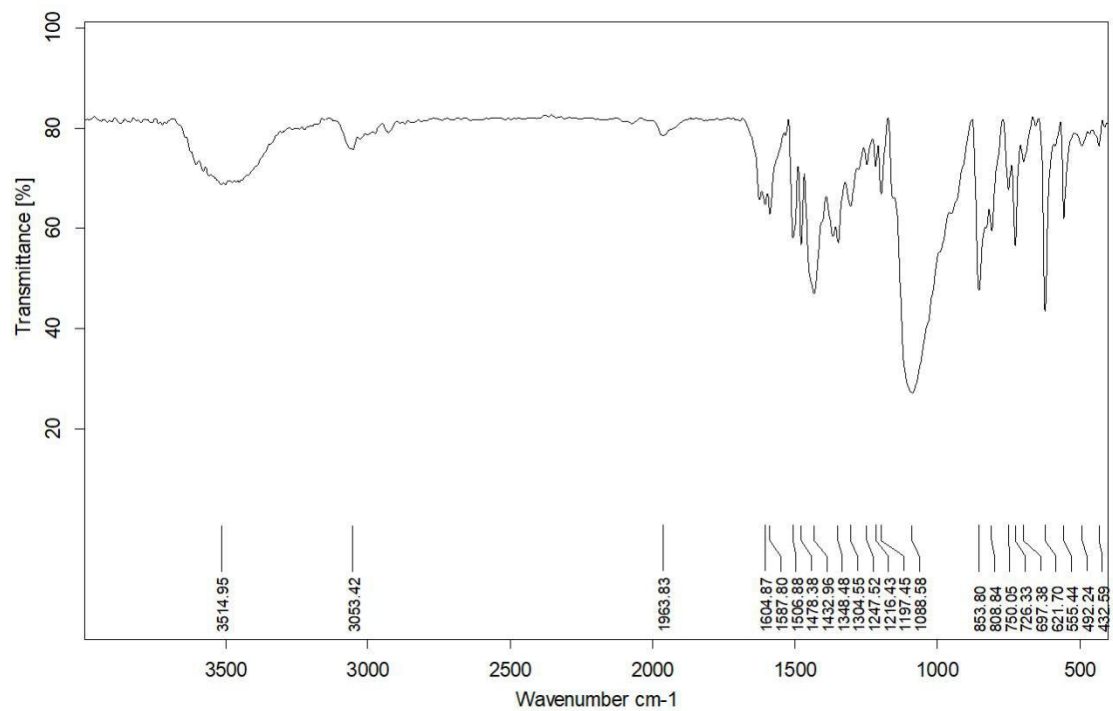

# $^1\text{H}$ NMR of $[\text{Ru}(\text{dmb})_2(\text{BTPIP})](\text{ClO}_4)_2$ (Ru(II)-3)

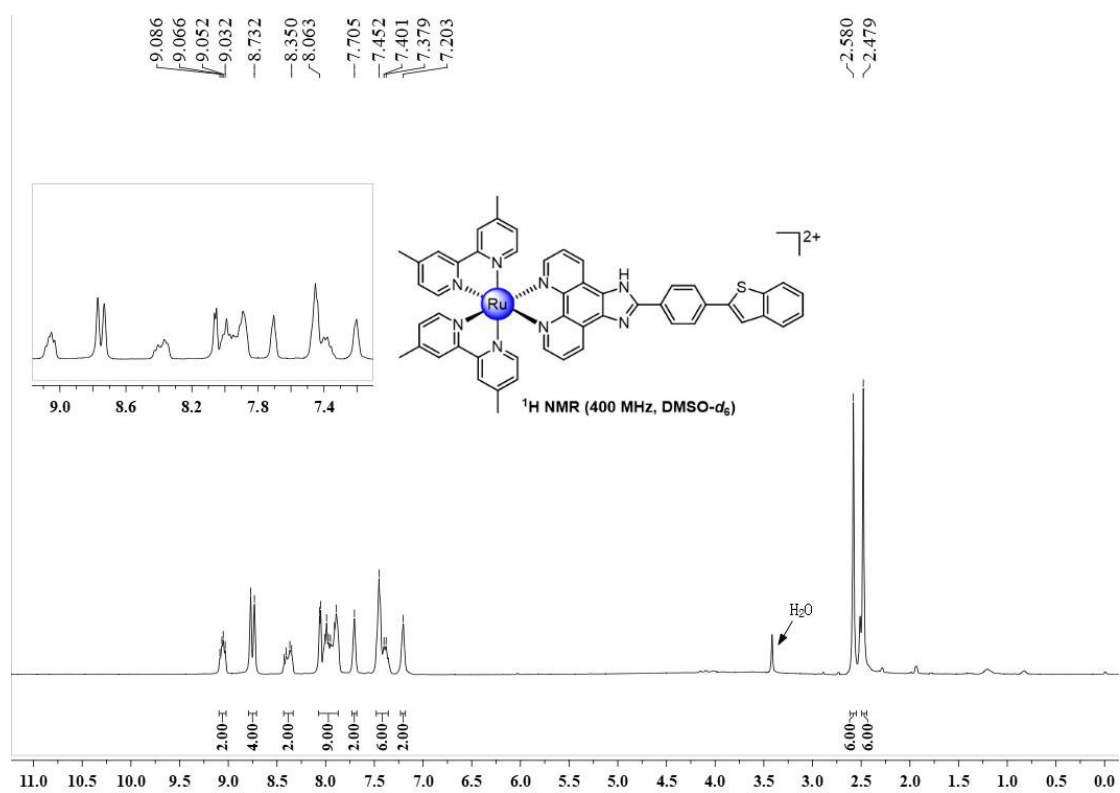

**$^{13}\text{C}$  NMR of  $[\text{Ru}(\text{dmb})_2(\text{BTPIP})](\text{ClO}_4)_2$  (Ru(II)-3)**

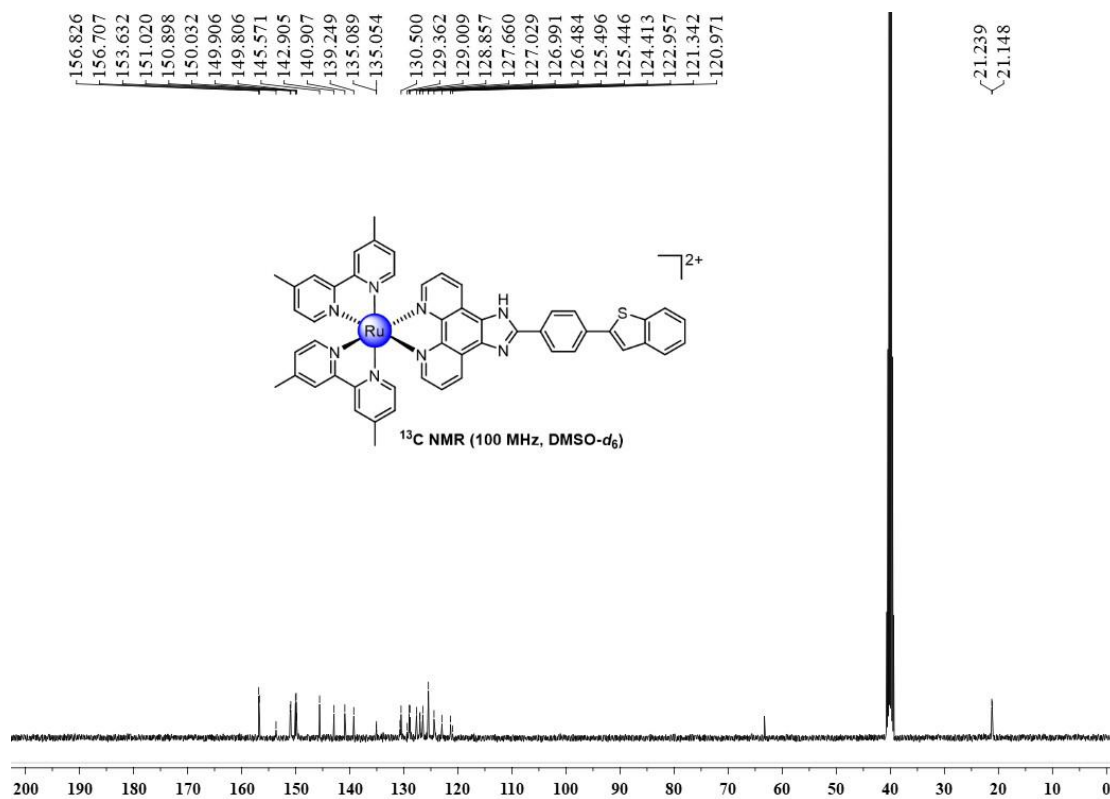

# HRMS of $[\text{Ru}(\text{dmb})_2(\text{BTPIP})](\text{ClO}_4)_2$ (Ru(II)-3)

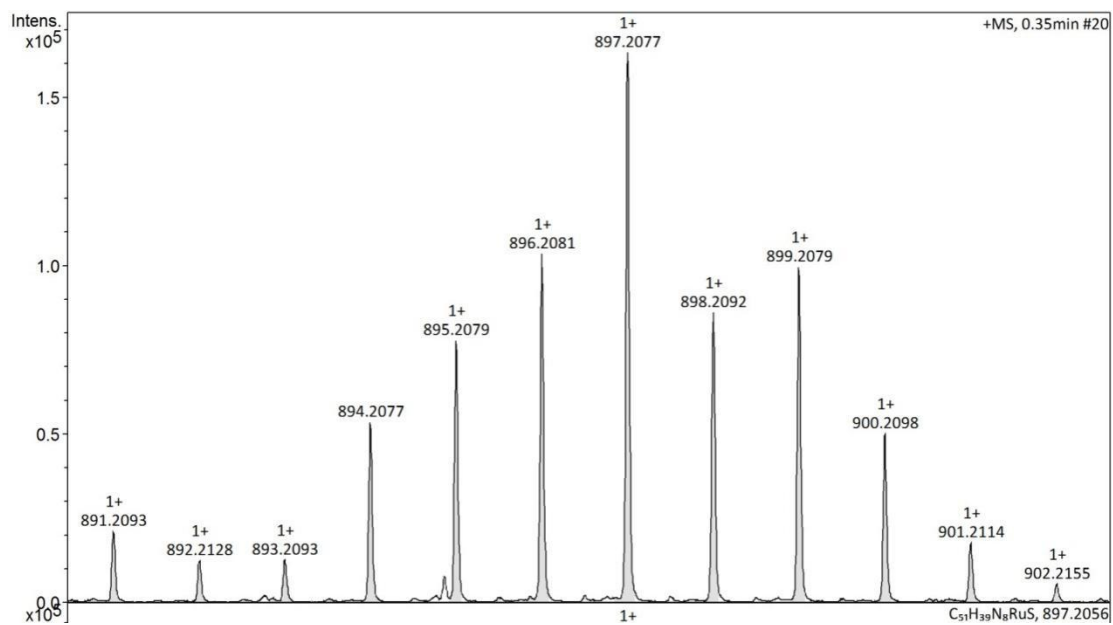

## Acquisition Parameter

|             |          |                      |          |                  |           |
|-------------|----------|----------------------|----------|------------------|-----------|
| Source Type | ESI      | Ion Polarity         | Positive | Set Nebulizer    | 0.6 Bar   |
| Focus       | Active   | Set Capillary        | 3500 V   | Set Dry Heater   | 180 °C    |
| Scan Begin  | 50 m/z   | Set End Plate Offset | -500 V   | Set Dry Gas      | 4.0 l/min |
| Scan End    | 1000 m/z | Set Charging Voltage | 0 V      | Set Divert Valve | Waste     |
|             |          | Set Corona           | 0 nA     | Set APCI Heater  | 0 °C      |

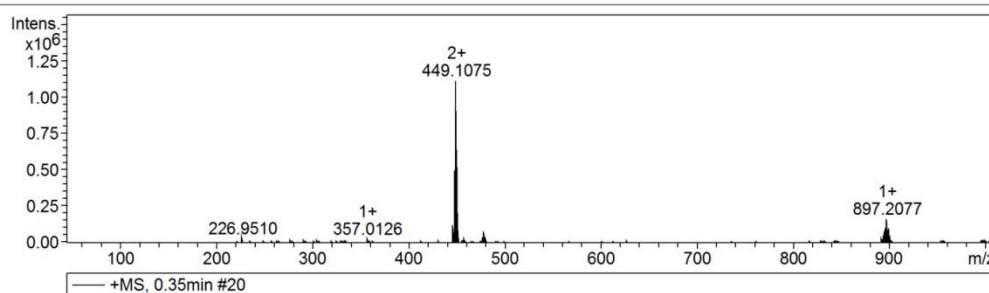

**IR of [Ru(dmb)<sub>2</sub>(BTPIP)](ClO<sub>4</sub>)<sub>2</sub> (Ru(II)-3)**

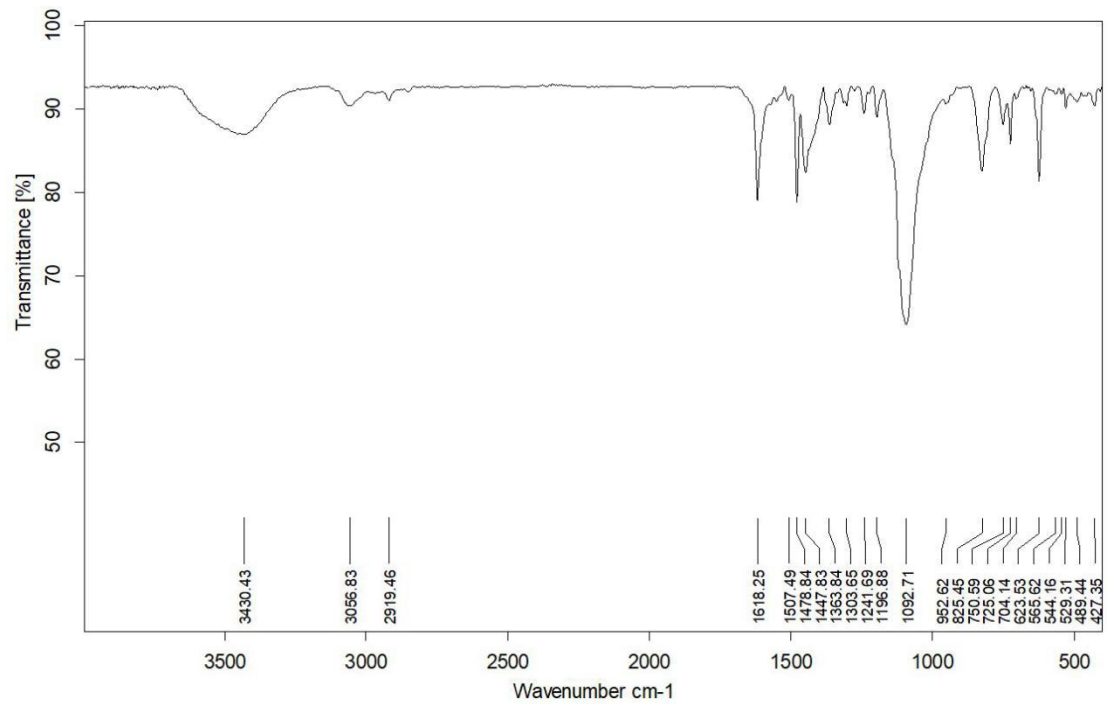

Supplement: d0dt04258g1.pdf [file d0dt04258g1.pdf]
